# Supplementary material for: Metabolism of Toxic Sugars by Strains of the Bee Gut Symbiont Gilliamella apicola
Source: PubMed Central journal article supplement (PMC5090037; doi:10.1128/mbio.01326-16), 2016-11-01
Supplement: mbo005163054sf1.pdf [file mbo005163054sf1.pdf]

| <b>Apis</b>   |   |   |   |   |   |   |  |   |   |  |   |   |   |
|---------------|---|---|---|---|---|---|--|---|---|--|---|---|---|
| wkB1          | + | + | + | + |   |   |  |   |   |  |   |   | + |
| P54G          | + | + | + | + |   |   |  |   |   |  |   |   | + |
| wkB7          | + | + | + | + |   | + |  |   |   |  |   |   | + |
| M6-3G         | + | + | + | + | + |   |  | + |   |  |   |   |   |
| M1-2G         |   | + | + | + | + | + |  | + |   |  |   |   |   |
| P62G          |   | + | + | + | + | + |  | + |   |  |   |   |   |
| P83G          |   | + | + | + | + | + |  | + |   |  |   |   |   |
| wkB308        |   | + | + | + | + | + |  |   |   |  |   |   |   |
| wkB292        |   | + | + | + | + | + |  |   |   |  |   |   |   |
| wkB72         |   | + | + | + | + | + |  |   |   |  |   |   | + |
| wkB195        |   | + | + | + | + | + |  |   |   |  |   |   | + |
| wkB112        |   | + |   |   |   |   |  |   |   |  |   |   | + |
| wkB178        |   | + |   |   |   |   |  | + |   |  |   | + |   |
| wkB108        |   | + | + | + | + | + |  |   | + |  | + |   |   |
| wkB171        |   | + | + | + | + | + |  |   |   |  |   |   |   |
| Gris1-4       | + | + |   | + | + | + |  |   |   |  |   |   |   |
| Imp1-6        | + | + |   | + | + | + |  |   |   |  |   |   |   |
| <b>Bombus</b> |   |   |   |   |   |   |  |   |   |  |   |   |   |
| Imp1-1        |   | + |   |   |   |   |  |   |   |  |   |   |   |
| Choc5-1       |   | + |   |   | + |   |  |   |   |  |   |   | + |
| GillExp13     |   | + | + |   | + |   |  |   |   |  |   |   |   |
| App6-5        |   | + |   |   |   |   |  |   |   |  |   |   |   |
| Occ4-3        |   | + |   |   |   |   |  |   |   |  |   |   |   |
| Bif1-4        |   | + |   |   |   |   |  |   |   |  |   |   |   |
| Bim1-2        |   | + |   |   |   |   |  |   |   |  |   |   |   |

**Fig. S1** The presence (“+”) of 11 mannose-family phosphotransferase systems with Enzyme IID domains in *G. apicola* strains. These PTS may also function in the transport of sugars other than mannose, such as glucose, sorbose, fructose, and N-acetylglucosamine.
