# Supplementary material for: Metabolism of Toxic Sugars by Strains of the Bee Gut Symbiont Gilliamella apicola
Source: PubMed Central journal article supplement (PMC5090037; doi:10.1128/mbio.01326-16), 2016-11-01
Supplement: mbo005163054sf2.pdf [file mbo005163054sf2.pdf]

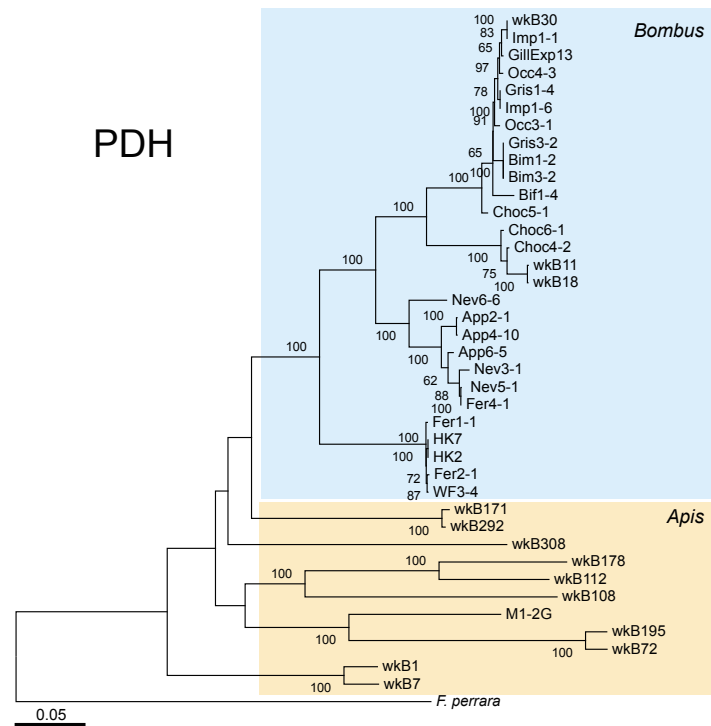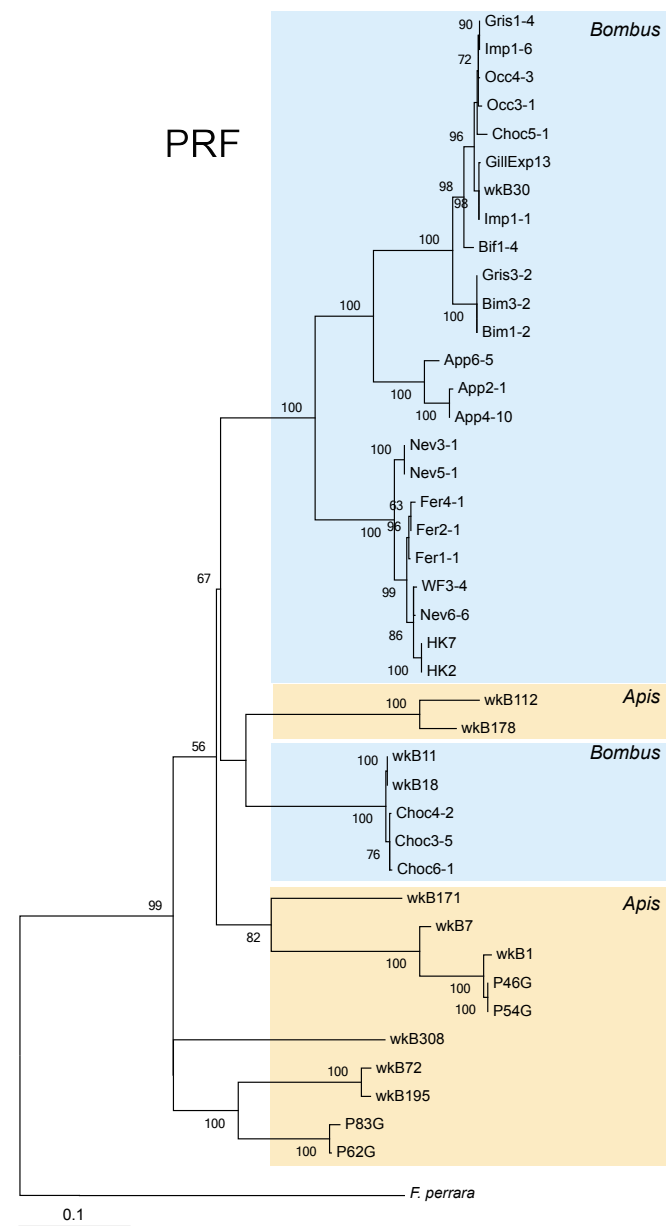

**Fig. S2** Maximum-likelihood trees of the concatenated sequences of three pyruvate dehydrogenase components (PDH) and the peptide release factor (PRF) of *G. apicola* strains and *Frischella perrara*. The trees are based on nucleotide sequences and were rooted using homologs from *F. perrara*. Nodes with bootstrap values >50% are marked (1,000 replicates).
