# Supplementary material for: Metabolism of Toxic Sugars by Strains of the Bee Gut Symbiont Gilliamella apicola
Source: PubMed Central journal article supplement (PMC5090037; doi:10.1128/mbio.01326-16), 2016-11-01
Supplement: mbo005163054sf3.pdf [file mbo005163054sf3.pdf]

|                          |           | Mannose     | Arabinose   |             |             | Rhamnose    |             |             | Xylose      |             | PL1 |
|--------------------------|-----------|-------------|-------------|-------------|-------------|-------------|-------------|-------------|-------------|-------------|-----|
|                          |           | <i>manA</i> | <i>araA</i> | <i>araB</i> | <i>araD</i> | <i>rhaA</i> | <i>rhaB</i> | <i>rhaD</i> | <i>xylA</i> | <i>xylB</i> |     |
| <i>St. appositus</i>     | App2-1    |             |             |             |             |             |             |             |             |             |     |
|                          | App4-10   |             |             |             |             |             |             |             |             |             |     |
|                          | App6-5    |             |             |             |             |             |             |             |             |             |     |
| <i>Th. pensylvanicus</i> | HK2       |             |             |             |             |             |             |             |             |             |     |
|                          | HK7       |             |             |             |             |             |             |             |             |             |     |
|                          | WF3-4     |             |             |             |             |             |             |             |             |             |     |
| <i>Th. fervidus</i>      | Fer1-1    |             |             |             |             |             |             |             |             |             |     |
|                          | Fer2-1    |             |             |             |             |             |             |             |             |             |     |
|                          | Fer4-1    |             |             |             |             |             |             |             |             |             |     |
| <i>Cu. griseocollis</i>  | Gris1-4   |             |             |             |             |             |             |             |             |             |     |
|                          | Gris3-2   |             |             |             |             |             |             |             |             |             |     |
| <i>Pr. bifarius</i>      | Bif1-4    |             |             |             |             |             |             |             |             |             |     |
| <i>Pr. bimaculatus</i>   | Bim1-2    |             |             |             |             |             |             |             |             |             |     |
|                          | Bim3-2    |             |             |             |             |             |             |             |             |             |     |
| <i>Pr. impatiens</i>     | Choc3-5   |             |             |             |             |             |             |             |             |             |     |
|                          | Choc4-2   |             |             |             |             |             |             |             |             |             |     |
|                          | Choc5-1   |             |             |             |             |             |             |             |             |             |     |
|                          | Choc6-1   |             |             |             |             |             |             |             |             |             |     |
|                          | GillExp13 |             |             |             |             |             |             |             |             |             |     |
| <i>Pr. vagans</i>        | Imp1-1    |             |             |             |             |             |             |             |             |             |     |
|                          | Imp1-6    |             |             |             |             |             |             |             |             |             |     |
|                          | wkB18     |             |             |             |             |             |             |             |             |             |     |
| <i>Bi. nevadensis</i>    | Nev3-1    |             |             |             |             |             |             |             |             |             |     |
|                          | Nev5-1    |             |             |             |             |             |             |             |             |             |     |
|                          | Nev6-6    |             |             |             |             |             |             |             |             |             |     |
| <i>Bo. occidentalis</i>  | Occ3-1    |             |             |             |             |             |             |             |             |             |     |
|                          | Occ4-3    |             |             |             |             |             |             |             |             |             |     |

**Fig. S3** The presence of the genes related to the metabolism of the four sugars and the pectate lyase gene (PL1) in *G. apicola* strains isolated from bumble bee guts. Colored boxes indicate gene presence, and white boxes indicate gene absence.
