# Supplementary material for: Metabolism of Toxic Sugars by Strains of the Bee Gut Symbiont Gilliamella apicola
Source: PubMed Central journal article supplement (PMC5090037; doi:10.1128/mbio.01326-16), 2016-11-01
Supplement: mbo005163054st1.pdf [file mbo005163054st1.pdf]

**Table S1.** Genome features of the *Gilliamella apicola* strains isolated from honey bee and bumble bee guts.

| Host genus             | Host subgenus              | Host species              | Strain                     | Total size (bp)           | No. of contigs              | N50          | Accession No.        | 16S rRNA similarity <sup>a</sup> (%) | Sequencing method    | Collection location                                    | Collection date                       |                                                         |                                            |            |
|------------------------|----------------------------|---------------------------|----------------------------|---------------------------|-----------------------------|--------------|----------------------|--------------------------------------|----------------------|--------------------------------------------------------|---------------------------------------|---------------------------------------------------------|--------------------------------------------|------------|
| <i>Apis</i>            | <i>Micrapis</i>            | <i>Apis andreniformis</i> | wkB171                     | 2,670,926                 | 59                          | 144,296      | LYST00000000         | 99.0                                 | Illumina MiSeq 2×300 | Hort Park, Singapore                                   | August, 2014                          |                                                         |                                            |            |
|                        |                            |                           | <i>Megapis</i>             | <i>Apis dorsata</i>       | wkB108                      | 3,076,170    | 23                   | 77,698                               | LZGM00000000         | 98.1                                                   | Illumina MiSeq 2×300                  | University of Malaya, Kuala Lumpur, Malaysia            | July, 2014                                 |            |
|                        | <i>Apis</i>                | <i>Apis cerana</i>        | wkB112                     | 2,532,308                 | 22                          | 293,117      | LZGL00000000         | 97.9                                 | Illumina MiSeq 2×300 | University of Malaya, Kuala Lumpur, Malaysia           | July, 2014                            |                                                         |                                            |            |
|                        |                            |                           | wkB178                     | 2,369,030                 | 16                          | 588,434      | LZGK00000000         | 98.9                                 | Illumina MiSeq 2×300 | Hort Park, Singapore                                   | August, 2014                          |                                                         |                                            |            |
|                        |                            |                           | wkB72                      | 2,570,834                 | 79                          | 213,610      | LZEI00000000         | 99.0                                 | Illumina MiSeq 2×300 | Kampung Baru Kuning Selatan, Negeri Sembilan, Malaysia | July, 2014                            |                                                         |                                            |            |
|                        |                            |                           | wkB195                     | 2,500,996                 | 38                          | 101,351      | LZGP00000000         | 99.0                                 | Illumina MiSeq 2×300 | Hort Park, Singapore                                   | August, 2014                          |                                                         |                                            |            |
|                        |                            |                           | wkB292                     | 2,741,181                 | 85                          | 98,188       | LZGO00000000         | 99.0                                 | Illumina MiSeq 2×300 | Hort Park, Singapore                                   | August, 2014                          |                                                         |                                            |            |
|                        |                            |                           | wkB308                     | 2,737,107                 | 46                          | 195,029      | LZGN00000000         | 97.2                                 | Illumina MiSeq 2×300 | Genting Highlands, Pahang, Malaysia                    | July, 2014                            |                                                         |                                            |            |
|                        |                            |                           | <i>Apis mellifera</i>      | P54G                      | 3,105,460                   | 56           | 129,582              | LZGJ00000000                         | 99.3                 | Illumina MiSeq 2×250                                   | West Haven, CT, USA                   | September, 2011                                         |                                            |            |
|                        |                            |                           |                            | P46G                      | 7,423,003                   | 2,781        | 5,899                | MCIW00000000                         | 99.3                 | Illumina MiSeq 2×250                                   | West Haven, CT, USA                   | September, 2011                                         |                                            |            |
|                        |                            |                           |                            | P62G                      | 2,549,106                   | 20           | 172,591              | LZGI00000000                         | 99.3                 | Illumina MiSeq 2×250                                   | West Haven, CT, USA                   | September, 2011                                         |                                            |            |
|                        |                            |                           |                            | P83G                      | 2,494,021                   | 29           | 230,310              | LZGH00000000                         | 99.1                 | Illumina MiSeq 2×250                                   | West Haven, CT, USA                   | July, 2014                                              |                                            |            |
|                        | <i>Bombus</i>              | <i>Subterraneobombus</i>  | <i>Bombus appositus</i>    | wkB7                      | 2,901,642                   | 1            | 2,901,642            | LZGG00000000                         | 99.6                 | PacBio RSII, Illumina MiSeq 2×250                      | West Haven, CT, USA                   | September, 2011                                         |                                            |            |
|                        |                            |                           |                            | M1-2G                     | 2,388,823                   | 10           | 342,893              | LZGQ00000000                         | 99.0                 | Illumina MiSeq 2×250                                   | West Haven, CT, USA                   | May, 2011                                               |                                            |            |
|                        |                            |                           |                            | M6-3G                     | 2,700,722                   | 83           | 191,995              | MCIU00000000                         | 98.9                 | Illumina MiSeq 2×250                                   | University of Texas, Austin, TX, USA  | February, 2014                                          |                                            |            |
|                        |                            |                           |                            | App2-1                    | 2,418,433                   | 73           | 71,484               | LZGR00000000                         | 98.1                 | Illumina MiSeq 2×300                                   | East of Logan along Hwy 89, Utah, USA | July, 2014                                              |                                            |            |
|                        |                            |                           |                            | App4-10                   | 2,434,386                   | 53           | 145,820              | LZGS00000000                         | 98.1                 | Illumina MiSeq 2×300                                   | East of Logan along Hwy 89, Utah, USA | July, 2014                                              |                                            |            |
|                        |                            |                           |                            | App6-5                    | 2,633,935                   | 106          | 66,665               | LZGT00000000                         | 98.6                 | Illumina MiSeq 2×300                                   | East of Logan along Hwy 89, Utah, USA | July, 2014                                              |                                            |            |
|                        |                            |                           |                            | <i>Thoracobombus</i>      | <i>Bombus pensylvanicus</i> | HK2          | 2,843,330            | 117                                  | 79,103               | LZGV00000000                                           | 98.8                                  | Illumina MiSeq 2×250                                    | Brackenridge Field Lab, Austin, Texas, USA | June, 2013 |
|                        |                            |                           |                            |                           |                             | HK7          | 2,832,078            | 137                                  | 59,720               | LZGU00000000                                           | 98.5                                  | Illumina MiSeq 2×250                                    | Brackenridge Field Lab, Austin, Texas, USA | June, 2013 |
| WF3-4                  |                            |                           |                            |                           |                             | 2,847,396    | 61                   | 165,092                              | LZGW00000000         | 99.0                                                   | Illumina MiSeq 2×300                  | Lady Bird Johnson Wildflower Centre, Austin, Texas, USA | June, 2014                                 |            |
| <i>Bombus fervidus</i> |                            |                           |                            |                           |                             | Fer1-1       | 2,741,337            | 118                                  | 44,896               | LZGX00000000                                           | 98.9                                  | Illumina MiSeq 2×300                                    | Logan, Utah, USA                           | July, 2014 |
|                        | Fer2-1                     | 2,611,703                 | 207                        | 24,516                    | LZGY00000000                | 99.0         | Illumina MiSeq 2×300 | Logan, Utah, USA                     | July, 2014           |                                                        |                                       |                                                         |                                            |            |
| <i>Cullumanobombus</i> | <i>Bombus griseocollis</i> | Fer4-1                    | 2,520,134                  | 360                       | 12,144                      | LZGZ00000000 | 98.7                 | Illumina MiSeq 2×300                 | Logan, Utah, USA     | July, 2014                                             |                                       |                                                         |                                            |            |
|                        |                            | Gris1-4                   | 2,358,864                  | 90                        | 58,267                      | LZHA00000000 | 98.6                 | Illumina MiSeq 2×250                 | New Haven, CT, USA   | June, 2013                                             |                                       |                                                         |                                            |            |
|                        |                            | Gris3-2                   | 2,552,527                  | 89                        | 61,124                      | LZHB00000000 | 98.6                 | Illumina MiSeq 2×300                 | New Haven, CT, USA   | June, 2013                                             |                                       |                                                         |                                            |            |
|                        |                            | <i>Pyrobombus</i>         | <i>Bombus bifarius</i>     | Bif1-4                    | 2,551,594                   | 98           | 176,528              | LZHC00000000                         | 98.8                 | Illumina MiSeq 2×300                                   | East of Logan along Hwy 89, Utah, USA | July, 2014                                              |                                            |            |
|                        |                            |                           |                            | <i>Bombus bimaculatus</i> | Bim1-2                      | 2,537,475    | 107                  | 71,558                               | LZHD00000000         | 98.6                                                   | Illumina MiSeq 2×250                  | New Haven, CT, USA                                      | June, 2013                                 |            |
|                        |                            |                           |                            |                           | Bim3-2                      | 2,592,778    | 177                  | 37,453                               | LZHE00000000         | 98.6                                                   | Illumina MiSeq 2×300                  | New Haven, CT, USA                                      | June, 2013                                 |            |
|                        |                            |                           |                            | <i>Bombus impatiens</i>   | Choc3-5                     | 2,193,011    | 89                   | 74,181                               | LZHF00000000         | 97.2                                                   | Illumina MiSeq 2×250                  | New Haven, CT, USA                                      | August, 2012                               |            |
|                        |                            |                           |                            |                           | Choc4-2                     | 2,245,186    | 78                   | 79,959                               | LZHG00000000         | 97.2                                                   | Illumina MiSeq 2×250                  | New Haven, CT, USA                                      | August, 2012                               |            |
|                        |                            |                           |                            |                           | Choc5-1                     | 2,628,355    | 125                  | 66,703                               | LZHH00000000         | 97.2                                                   | Illumina MiSeq 2×250                  | New Haven, CT, USA                                      | August, 2012                               |            |
|                        |                            | Choc6-1                   | 2,180,622                  |                           | 68                          | 105,607      | LZHI00000000         | 96.2                                 | Illumina MiSeq 2×250 | New Haven, CT, USA                                     | August, 2012                          |                                                         |                                            |            |
| <i>Bombias</i>         | <i>Bombus nevadensis</i>   | GillExp13                 | 2,392,232                  | 163                       | 33,677                      | LZHI00000000 | 98.7                 | Illumina MiSeq 2×250                 | New Haven, CT, USA   | August, 2012                                           |                                       |                                                         |                                            |            |
|                        |                            | Imp1-1                    | 2,359,762                  | 141                       | 34,994                      | LZHK00000000 | 98.7                 | Illumina MiSeq 2×250                 | New Haven, CT, USA   | June, 2013                                             |                                       |                                                         |                                            |            |
|                        |                            | Imp1-6                    | 2,269,603                  | 91                        | 45,049                      | LZHL00000000 | 98.8                 | Illumina MiSeq 2×250                 | New Haven, CT, USA   | June, 2013                                             |                                       |                                                         |                                            |            |
|                        |                            | <i>Bombus vagans</i>      | wkB18                      | 2,371,993                 | 25                          | 67,286       | LZHM00000000         | 97.2                                 | Illumina MiSeq 2×250 | New Haven, CT, USA                                     | June, 2011                            |                                                         |                                            |            |
|                        |                            |                           | Nev3-1                     | 2,857,512                 | 93                          | 106,933      | LZHN00000000         | 98.8                                 | Illumina MiSeq 2×300 | East of Logan along Hwy 89, Utah, USA                  | July, 2014                            |                                                         |                                            |            |
|                        |                            | <i>Bombus</i>             | <i>Bombus occidentalis</i> | Nev5-1                    | 2,713,492                   | 94           | 74,914               | LZHO00000000                         | 98.9                 | Illumina MiSeq 2×300                                   | East of Logan along Hwy 89, Utah, USA | July, 2014                                              |                                            |            |
|                        |                            |                           |                            | Nev6-6                    | 2,689,628                   | 103          | 70,613               | LZHP00000000                         | 99.4                 | Illumina MiSeq 2×300                                   | East of Logan along Hwy 89, Utah, USA | July, 2014                                              |                                            |            |
|                        |                            |                           |                            | Occ3-1                    | 2,232,791                   | 36           | 101,835              | LZHQ00000000                         | 98.8                 | Illumina MiSeq 2×300                                   | East of Logan along Hwy 89, Utah, USA | July, 2014                                              |                                            |            |
|                        |                            |                           |                            | Occ4-3                    | 2,686,218                   | 124          | 56,684               | LZHR00000000                         | 98.6                 | Illumina MiSeq 2×300                                   | East of Logan along Hwy 89, Utah, USA | July, 2014                                              |                                            |            |

<sup>a</sup>The 16S rRNA sequences of *G. apicola* strains were compared to that of strain wkB1.
